# Supplementary material for: The Association between Term Chorioamnionitis during Labor and Long-Term Infectious Morbidity of the Offspring
Source: MDPI journal article supplement (doi:10.3390/jcm13030814), 2024-01-31
Supplement: s1 [file s1]

**Table S1:** ICD-9 Codes for pediatric infectious morbidity

| Group                                   | Diag. code | Diagnosis description                                                                    |
|-----------------------------------------|------------|------------------------------------------------------------------------------------------|
| <b>Bacteremia /<br/>Septicemia</b>      | 7907       | BACTEREMIA                                                                               |
|                                         | 99591      | SEPSIS                                                                                   |
|                                         | 99592      | SEVERE SEPSIS                                                                            |
|                                         | 99592      | SYSTEMIC INFLAMMATORY RESPONSE SYNDROME DUE TO INFECTIOUS PROCESS WITH ORGAN DYSFUNCTION |
| <b>Bacterial infections</b>             | 0414       | ESCHERICHIA COLI (E. COLI), UNSP. SITE                                                   |
|                                         | 0414       | ESCHERICHIA COLI (E. COLI), UNSP. SITE (ADDITIONAL CODE)                                 |
|                                         | 0414       | ESCHERICHIA COLI(E. COLI),CONDITI.CLASSIF.ELSEWHERE,UNSP.SITE                            |
|                                         | 0413       | FRIEDLANDER'S BACILLUS, UNSP. SITE                                                       |
|                                         | 0413       | FRIEDLANDER'S BACILLUS;CONDITION CLASSIF.ELSEWHERE,UNSP.SITE                             |
|                                         | 0415       | HEMOPHILUS INFLUENZAE IN CONDIT.CLASSIF.ELSEWHERE,UNSP.SITE                              |
|                                         | 0415       | HEMOPHILUS INFLUENZAE, UNSP. SITE (H.INFLUENZAE)                                         |
|                                         | 0413       | KLEBSIELLA PNEUMONIAE                                                                    |
|                                         | 0369       | MENINGOCOCCAL INFECTION, UNSPECIFIED                                                     |
|                                         | 04112      | METHICILLIN RESISTANT STAPHYLOCOCCUS AUREUS                                              |
|                                         | 04111      | METHICILLIN SUSCEPTIBLE STAPHYLOCOCCUS AUREUS                                            |
|                                         | 04185      | OTHER GRAM-NEGATIVE ORGANISMS INFECTION                                                  |
|                                         | 03689      | OTHER SPECIFIED MENINGOCOCCAL INFECTIONS                                                 |
|                                         | 04119      | OTHER STAPHYLOCOCCUS INFECTION                                                           |
|                                         | 04109      | OTHER STREPTOCOCCUS INFECTION.                                                           |
|                                         | 0412       | PNEUMOCOCCUS INFECTION.IN CONDITION CLASSIF.ELSEWHERE;UNSP.SITE                          |
|                                         | 0412       | PNEUMOCOCCUS INFECTION, UNSP. SITE                                                       |
|                                         | 0416       | PROTEUS (MIRABILIS,MORGANII), UNSP. SITE                                                 |
|                                         | 0416       | PROTEUS(MIRABILIS,MORGANII)CONDIT,CLASSIF.ELSEWHERE,UNSP.SITE                            |
|                                         | 0417       | PSEUDOMONAS INFECTION., UNSP. SITE                                                       |
|                                         | 0417       | PSEUDOMONAS INFECTION.IN CONDIT.CLASSIF.ELSEWHERE,UNSPEC.SITE                            |
|                                         | 04111      | STAPHYLOCOCCUS AUREUS INFECTION.                                                         |
|                                         | 04111      | STAPHYLOCOCCUS AUREUS INFECTION. (ADDITIONAL CODE)                                       |
|                                         | 0411       | STAPHYLOCOCCUS INFECTION.IN CONDIT.CLASSIF.ELSEWHERE,UNSP.SITE                           |
|                                         | 04110      | STAPHYLOCOCCUS INFECTION, UNSP.                                                          |
|                                         | 0411       | STAPHYLOCOCCUS INFECTION, UNSP. SITE                                                     |
|                                         | 04101      | STREPTOCOCCUS INFECTION., GROUP A                                                        |
|                                         | 04101      | STREPTOCOCCUS INFECTION., GROUP A (ADDITIONAL CODE)                                      |
|                                         | 04102      | STREPTOCOCCUS INFECTION., GROUP B                                                        |
|                                         | 04103      | STREPTOCOCCUS INFECTION., GROUP C                                                        |
|                                         | 04104      | STREPTOCOCCUS INFECTION., GROUP D (ENTEROCOCCUS)                                         |
|                                         | 04105      | STREPTOCOCCUS INFECTION., GROUP G                                                        |
|                                         | 04100      | STREPTOCOCCUS INFECTION., UNSP.                                                          |
|                                         | 0410       | STREPTOCOCCUS INFECTION.IN CONDITION CLASSIF.ELSEWHERE;UNSP.SITE                         |
| <b>Blood-borne virus<br/>infections</b> | 042        | HUMAN IMMUNODEFIC. VIRUS (HIV) DIS. /AIDS                                                |
|                                         | 07959      | OTHER SPECIFIED RETROVIRUS                                                               |
|                                         | 07950      | RETROVIRUS, UNSP.,UNSP. SITE                                                             |

|                                  |       |                                                                   |
|----------------------------------|-------|-------------------------------------------------------------------|
|                                  | 0709  | UNSP. VIRAL HEPATITIS WITHOUT HEPATIC COMA                        |
|                                  | 0709  | UNSPECIFIED VIRAL HEPATITIS WITHOUT MENTION OF HEPATIC COMA       |
|                                  | 07030 | VIRAL HEPATITIS B WITHOUT HEPATIC COMA & HEPATITIS DELTA -92      |
|                                  | 07030 | VIRAL HEPATITIS B WITHOUT HEPATIC COMA,AC/UNSP.WITHOUT HEP. DELTA |
|                                  | 07032 | VIRAL HEPATITS B WITHOUT HEPATIC COMA,CHR. WITHOUT HEPATITIS DELT |
|                                  | V08   | ASYMPTOMATIC H.I.V INFECTION STATUS                               |
| <b>Cardiovascular infections</b> | 4211  | ACUTE + SUBACUTE INFEC.ENDOCARDITIS IN DIS.CLASS.ELSEWHERE        |
|                                  | 4210  | ACUTE AND SUBACUTE BACTERIAL ENDOCARDITIS                         |
|                                  | 42290 | ACUTE MYOCARDITIS, UNSPECIFIED                                    |
|                                  | 42090 | ACUTE PERICARDITIS, UNSPECIFIED                                   |
|                                  | 42291 | IDIOPATHIC MYOCARDITIS                                            |
|                                  | 4290  | MYOCARDITIS, UNSPECIFIED                                          |
|                                  | 42099 | OTHER ACUTE PERICARDITIS                                          |
|                                  | 42292 | SEPTIC MYOCARDITIS                                                |
|                                  | 41512 | SEPTIC PULMONARY EMBOLISM                                         |
| <b>CNS infections</b>            | 320   | BACTERIAL MENINGITIS                                              |
|                                  | 3200  | HEMOPHILUS MENINGITIS                                             |
|                                  | 3240  | INTRACRANIAL ABSCESS                                              |
|                                  | 3249  | INTRACRANIAL AND INTRASPINAL ABSCESS OF UNSPECIFIED SITE          |
|                                  | 3241  | INTRASPINAL ABSCESS                                               |
|                                  | 326   | LATE EFFECTS OF INTRACRANIAL ABSCESS OR PYOGENIC INFECTION        |
|                                  | 32082 | MENINGITIS DUE TO GRAM-NEGATIVE                                   |
|                                  | 3208  | MENINGITIS DUE TO OTHER SPECIFIED BACTERIA                        |
|                                  | 32089 | MENINGITIS DUE TO OTHER SPECIFIED BACTERIA                        |
|                                  | 3209  | MENINGITIS DUE TO UNSPECIFIED BACTERIUM                           |
|                                  | 3207  | MENINGITIS IN OTHER BACTERIAL DISEASES CLASSIFIED ELSEWHERE       |
|                                  | 325   | PHLEBITIS AND THROMBOPHLEBITIS OF INTRACRANIAL VENOUS SINUSES     |
|                                  | 3201  | PNEUMOCOCCAL MENINGITIS                                           |
|                                  | 3203  | STAPHYLOCOCCAL MENINGITIS                                         |
|                                  | 3202  | STREPTOCOCCAL MENINGITIS                                          |
|                                  | 05472 | HERPES SIMPLEX MENINGITIS                                         |
|                                  | 0543  | HERPETIC MENINGOENCEPHALITIS                                      |
|                                  | 32361 | INFECTIOUS ACUTE DISSEMINATED ENCEPHALOMYELITIS (ADEM)            |
|                                  | 0470  | MENINGITIS DUE TO COXSACKIE VIRUS                                 |
|                                  | 0471  | MENINGITIS DUE TO ECHO VIRUS                                      |
|                                  | 0360  | MENINGOCOCCAL MENINGITIS                                          |
|                                  | 0362  | MENINGOCOCCEMIA                                                   |
|                                  | 0491  | NON-ARTHOPOD-BORNE MENINGITIS DUE TO ADENOVIRUS                   |
|                                  | 048   | OTHER ENTEROVIRUS DISEASES OF CENTRAL NERVOUS SYSTEM              |
|                                  | 05829 | OTHER HUMAN HERPESVIRUS ENCEPHALITIS                              |
|                                  | 0478  | OTHER SPECIFIED VIRAL MENINGITIS                                  |
|                                  | 3236  | POSTINFECTIOUS ENCEPHALITIS                                       |
|                                  | 0630  | RUSSIAN SPRING-SUMMER (TAIGA) ENCEPHALITIS                        |

|                          |       |                                                                |
|--------------------------|-------|----------------------------------------------------------------|
|                          | 0499  | UNSP.NON-ARTHROPOD-BORNE VIRAL DIS.OF CENTRAL NERVOUS SYSTEM   |
|                          | 0479  | UNSPECIFIED VIRAL MENINGITIS                                   |
|                          | 06641 | WEST NILE FEVER WITH ENCEPHALITIS                              |
| <b>ENT infections</b>    | 38200 | AC.SUPPURAT.OTITIS MEDIA WITHOUT SPONTAN.RUPTURE OF EARDRUM    |
|                          | 38104 | ACUTE ALLERGIC SEROUS OTITIS MEDIA                             |
|                          | 38300 | ACUTE MASTOIDITIS WITHOUT COMPLICATIONS                        |
|                          | 38400 | ACUTE MYRINGITIS, UNSPECIFIED                                  |
|                          | 38100 | ACUTE NONSUPPURATIVE OTITIS MEDIA, UNSPECIFIED                 |
|                          | 38001 | ACUTE PERICHONDritis OF PINNA                                  |
|                          | 38101 | ACUTE SEROUS OTITIS MEDIA                                      |
|                          | 38201 | ACUTE SUPPURAT.OTITIS MEDIA WITH SPONTAN.RUPTURE OF EARDRUM    |
|                          | 3820  | ACUTE SUPPURATIVE OTITIS MEDIA                                 |
|                          | 38401 | BULLOUS MYRINGITIS                                             |
|                          | 11282 | CANDIDAL OTITIS EXTERNA                                        |
|                          | 38531 | CHOLESTEATOMA OF ATTIC                                         |
|                          | 38532 | CHOLESTEATOMA OF MIDDLE EAR                                    |
|                          | 38530 | CHOLESTEATOMA, UNSPECIFIED                                     |
|                          | 38003 | CHONDritis OF PINNA                                            |
|                          | 3831  | CHRONIC MASTOIDITIS                                            |
|                          | 38015 | CHRONIC MYCOTIC OTITIS EXTERNA                                 |
|                          | 38002 | CHRONIC PERICHONDritis OF PINNA                                |
|                          | 38110 | CHRONIC SEROUS OTITIS MEDIA, SIMPLE OR UNSPECIFIED             |
|                          | 3821  | CHRONIC TUBOTYMPANIC SUPPURATIVE OTITIS MEDIA                  |
|                          | 0740  | HERPANGINA                                                     |
|                          | 38010 | INFECTIVE OTITIS EXTERNA, UNSPECIFIED                          |
|                          | 3814  | NONSUPPURATIVE OTITIS MEDIA, NOT SPECIFIED AS ACUTE OR CHRONIC |
|                          | 38022 | OTHER ACUTE OTITIS EXTERNA                                     |
|                          | 3813  | OTHER AND UNSPECIFIED CHRONIC NONSUPPURATIVE OTITIS MEDIA      |
|                          | 38129 | OTHER CHRONIC MUCOID OTITIS MEDIA                              |
|                          | 38023 | OTHER CHRONIC OTITIS EXTERNA                                   |
|                          | 38119 | OTHER CHRONIC SEROUS OTITIS MEDIA                              |
|                          | 38330 | POSTMASTOIDECTOMY COMPLICATION, UNSPECIFIED                    |
|                          | 38301 | SUBPERIOSTEAL ABSCESS OF MASTOID                               |
|                          | 382   | SUPPURATIVE AND UNSPECIFIED OTITIS MEDIA                       |
|                          | 3823  | UNSPECIFIED CHRONIC SUPPURATIVE OTITIS MEDIA                   |
|                          | 3839  | UNSPECIFIED MASTOIDITIS                                        |
|                          | 3829  | UNSPECIFIED OTITIS MEDIA                                       |
|                          | 3824  | UNSPECIFIED SUPPURATIVE OTITIS MEDIA                           |
|                          | 101   | VINCENT'S ANGINA                                               |
| <b>Fungal infections</b> | 1173  | ASPERGILLOSIS                                                  |
|                          | 1160  | BLASTOMYCOSIS                                                  |
|                          | 11281 | CANDIDAL ENDOCARDITIS                                          |
|                          | 11284 | CANDIDAL ESOPHAGITIS                                           |

|               |       |                                                             |
|---------------|-------|-------------------------------------------------------------|
|               | 1124  | CANDIDIASIS OF LUNG                                         |
|               | 1129  | CANDIDIASIS OF UNSPECIFIED SITE                             |
|               | 1175  | CRYPTOCOCCOSIS                                              |
|               | 1228  | ECHINOCOCCOSIS, UNSPECIFIED, OF LIVER                       |
|               | 1225  | ECHINOCOCCUS MULTILOCULARIS INFECTION OF LIVER              |
|               | 1179  | OTHER AND UNSPECIFIED MYCOSES                               |
|               | 11289 | OTHER CANDIDIASIS OF OTHER SPECIFIED SITES                  |
|               | 1209  | SCHISTOSOMIASIS, UNSPECIFIED                                |
|               | 1177  | ZYGOMYCOSIS (PHYCOMYCOSIS OR MUCORMYCOSIS)                  |
| GI infections | 0069  | AMEBIASIS, UNSPECIFIED                                      |
|               | 0068  | AMEBIC INFECTION OF OTHER SITES                             |
|               | 1270  | ASCARIASIS                                                  |
|               | 0085  | BACTERIAL ENTERITIS, UNSPECIFIED                            |
|               | 0070  | BALANTIDIASIS                                               |
|               | 0051  | BOTULISM                                                    |
|               | 0091  | COLITIS,ENTERITIS,GASTROENTERITIS OF PRESUMED INF. ORIGIN   |
|               | 0074  | CRYPTOSPORIDIOSIS                                           |
|               | 0075  | CYCLOSPORIASIS                                              |
|               | 1229  | ECHINOCOCCOSIS, OTHER AND UNSPECIFIED                       |
|               | 00862 | ENTERITIS DUE TO ADENOVIRUS                                 |
|               | 00865 | ENTERITIS DUE TO CALICIVIRUS                                |
|               | 00867 | ENTERITIS DUE TO ENTEROVIRUS, N.E.C.                        |
|               | 00861 | ENTERITIS DUE TO ROTAVIRUS                                  |
|               | 1274  | ENTEROBIASIS                                                |
|               | 0059  | FOOD POISONING, UNSPECIFIED                                 |
|               | 0071  | GIARDIASIS                                                  |
|               | 04186 | HELICOBACTER PYLORI (H. PYLORI) INFECTION                   |
|               | 1289  | HELMINTH INFECTION, UNSPECIFIED                             |
|               | 1236  | HYMENOLEPIASIS                                              |
|               | 0090  | INFECTIOUS COLITIS, ENTERITIS, & GASTROENTERITIS            |
|               | 0090  | INFECTIOUS COLITIS, ENTERITIS, AND GASTROENTERITIS          |
|               | 0092  | INFECTIOUS DIARRHEA                                         |
|               | 1279  | INTESTINAL HELMINTHIASIS, UNSPECIFIED                       |
|               | 0082  | INTESTINAL INFEC. DUE TO AEROBACTER AEROGENES               |
|               | 00843 | INTESTINAL INFEC. DUE TO CAMPYLOBACTER                      |
|               | 00842 | INTESTINAL INFEC. DUE TO PSEUDOMONAS                        |
|               | 00841 | INTESTINAL INFEC. DUE TO STAPHYLOCOCCUS                     |
|               | 0088  | INTESTINAL INFECTION DUE TO OTHER ORGANISM,NOT ELSEW.CLASS. |
|               | 0084  | INTESTINAL INFECTION DUE TO OTHER SPECIFIED BACTERIA        |
|               | 008   | INTESTINAL INFECTIONS DUE TO OTHER ORGANISMS                |
|               | 129   | INTESTINAL PARASITISM, UNSPECIFIED                          |
|               | 0073  | INTESTINAL TRICHOMONIASIS                                   |
|               | 0270  | LISTERIOSIS                                                 |
|               | 1278  | MIXED INTESTINAL HELMINTHIASIS                              |
|               | 00329 | OTHER LOCALIZED SALMONELLA INFECTIONS                       |

|                                      |        |                                                                    |
|--------------------------------------|--------|--------------------------------------------------------------------|
|                                      | 0078   | OTHER SPECIFIED PROTOZOAL INTESTINAL DISEASES                      |
|                                      | 0038   | OTHER SPECIFIED SALMONELLA INFECTIONS                              |
|                                      | 0048   | OTHER SPECIFIED SHIGELLA INFECTIONS                                |
|                                      | 00869  | OTHER VIRAL ENTERITIS                                              |
|                                      | 0022   | PARATYPHOID FEVER B                                                |
|                                      | 0023   | PARATYPHOID FEVER C                                                |
|                                      | 00323  | SALMONELLA ARTHRITIS                                               |
|                                      | 0030   | SALMONELLA GASTROENTERITIS                                         |
|                                      | 0039   | SALMONELLA INFECTION, UNSPECIFIED                                  |
|                                      | 00321  | SALMONELLA MENINGITIS                                              |
|                                      | 0031   | SALMONELLA SEPTICEMIA                                              |
|                                      | 0042   | SHIGELLA BOYDII                                                    |
|                                      | 0040   | SHIGELLA DYSENTERIAE                                               |
|                                      | 0041   | SHIGELLA FLEXNERI                                                  |
|                                      | 0043   | SHIGELLA SONNEI                                                    |
|                                      | 0049   | SHIGELLOSIS, UNSPECIFIED                                           |
|                                      | 1369   | UNSP. INFECTIOUS & PARASITIC DISEASES                              |
|                                      | 1369   | UNSPECIFIED INFECTIOUS AND PARASITIC DISEASES                      |
|                                      | 0079   | UNSPECIFIED PROTOZOAL INTESTINAL DISEASE                           |
| <b>Gynecological infections</b>      | 6163   | ABSCESS OF BARTHOLIN'S GLAND                                       |
|                                      | 64663  | ANTEPARTUM INFECTIONS OF GENITOURINARY TRACT                       |
|                                      | 1121   | CANDIDIASIS OF VULVA AND VAGINA                                    |
|                                      | 6162   | CYST OF BARTHOLIN'S GLAND                                          |
|                                      | 64662  | INFECT.OF GENITOURINARY TR.IN PREGN.,WITH DELIV.,WITH POSTP.COMPL. |
|                                      | 64660  | INFECTIONS OF GENITOURINARY TRACT IN PREGN.,UNSP.EPISODE           |
|                                      | 6164   | OTHER ABSCESS OF VULVA                                             |
|                                      | 64664  | POSTPARTUM INFECTIONS OF GENITOURINARY TRACT                       |
|                                      | 61610  | VAGINITIS AND VULVOVAGINITIS, UNSPECIFIED                          |
| <b>Invasive bacterial infections</b> | 0388 3 | ACITINOBACTER SEPTICEMIA                                           |
|                                      | 0388 1 | CANDIDA SEPTICEMIA                                                 |
|                                      | 0388 2 | ENTEROCOCCUS SEPTICEMIA                                            |
|                                      | 038491 | KLEBSIELLA SEPTICEMIA                                              |
|                                      | 03812  | METHICILLIN RESISTANT STAPHYLOCOCCUS AUREUS SEPTICEMIA             |
|                                      | 03811  | METHICILLIN SUSCEPTIBLE STAPHYLOCOCCUS AUREUS SEPTICEMIA           |
|                                      | 03849  | OTHER SEPTICEMIA DUE TO GRAM-NEGATIVE ORGANISMS                    |
|                                      | 0388   | OTHER SPECIFIED SEPTICEMIAS                                        |
|                                      | 03819  | OTHER STAPHYLOCOCCAL SEPTICEMIA                                    |
|                                      | 0382   | PNEUMOCOCCAL SEPTICEMIA                                            |
|                                      | 0383   | SEPTICEMIA DUE TO ANAEROBES                                        |
|                                      | 03842  | SEPTICEMIA DUE TO ESCHERICHIA COLI (E. COLI)                       |
|                                      | 03840  | SEPTICEMIA DUE TO GRAM-NEGATIVE ORGANISM, UNSPECIFIED              |
|                                      | 03841  | SEPTICEMIA DUE TO HEMOPHILUS INFLUENZAE (H. INFLUENZAE)            |
|                                      | 03843  | SEPTICEMIA DUE TO PSEUDOMONAS                                      |
|                                      | 0381   | STAPHYLOCOCCAL SEPTICEMIA                                          |

|                              |        |                                                                                                            |
|------------------------------|--------|------------------------------------------------------------------------------------------------------------|
|                              | 03810  | STAPHYLOCOCCAL SPETICEMIA, UNSP.                                                                           |
|                              | 03811  | STAPHYLOCOCCUS AUREUS SEPTICEMIA                                                                           |
|                              | 0380   | STREPTOCOCCAL SEPTICEMIA                                                                                   |
|                              | 0389   | UNSPECIFIED SEPTICEMIA                                                                                     |
| <b>Neonatal infections</b>   | 7775   | NECROTIZING ENTEROCOLITIS IN FETUS OR NEWBORN                                                              |
|                              | 77750  | NECROTIZING ENTEROCOLITIS IN NEWBORN, UNSPECIFIED                                                          |
|                              | 77753  | STAGE III NECROTIZING ENTEROCOLITIS IN NEWBORN                                                             |
|                              | 77183  | BACTEREMIA OF NEWBORN                                                                                      |
|                              | 7711   | CONGENITAL CYTOMEGALOVIRUS INFECTION                                                                       |
|                              | 7700   | CONGENITAL PNEUMONIA                                                                                       |
|                              | 771    | INFECTIONS SPECIFIC TO THE PERINATAL PERIOD                                                                |
|                              | 7717   | NEONATAL CANDIDA INFECTION                                                                                 |
|                              | 7716   | NEONATAL CONJUNCTIVITIS AND DACRYOCYSTITIS                                                                 |
|                              | 7718 2 | NEONATAL SEPSIS WORK UP                                                                                    |
|                              | 7718 1 | NEONATAL URINARY TRACT INFECTION                                                                           |
|                              | 7712   | OTHER CONGENITAL INFECTIONS SPECIFIC TO THE PERINATAL PERIOD                                               |
|                              | 7718   | OTHER TYPE OF INFECTION SPECIFIC TO THE PERINATAL PERIOD                                                   |
|                              | 7701 2 | PNEUMONIA DUE TO MECONIUM ASPIRATION                                                                       |
|                              | 7718 0 | SEPTICEMIA (SEPSIS) OF NEWBORN                                                                             |
|                              | 77181  | SEPTICEMIA (SEPSIS) OF NEWBORN                                                                             |
|                              | 77182  | URINARY TRACT INFECTION OF NEWBORN                                                                         |
| <b>Nosocomial infections</b> | V0991  | INFECTION WITH DRUG-RESISTANT MICROORGAN.,UNSPEC. DRUG RESISTANCE NOS, WITH MULTIPLE DRUG RESISTANCE       |
|                              | V091   | INFECTION WITH MICROORGAN. RESISTANT TO CEPHALOSPORINS/B-LACTAM ANTIBIOTICS                                |
|                              | V0980  | INFECTION WITH MICROORGAN. RESISTANT TO OTHER SPEC. DRUGS, WITHOUT MENTION OF RESISTANCE TO MULTIPLE DRUGS |
|                              | 00845  | INTESTINAL INFEC. DUE TO CLOSTRIDIUM DIFFICILE                                                             |
| <b>Ophthalmic infections</b> | 37313  | ABSCESS OF EYELID                                                                                          |
|                              | 37300  | BLEPHARITIS, UNSPECIFIED                                                                                   |
|                              | 37230  | CONJUNCTIVITIS, UNSPECIFIED                                                                                |
|                              | 37601  | ORBITAL CELLULITIS                                                                                         |
|                              | 376010 | PERIORBITAL CELLULITIS                                                                                     |
| <b>Orthopedic infections</b> | 73007  | ACUTE OSTEOMYELITIS INVOLVING ANKLE AND FOOT                                                               |
|                              | 73003  | ACUTE OSTEOMYELITIS INVOLVING FOREARM                                                                      |
|                              | 73004  | ACUTE OSTEOMYELITIS INVOLVING HAND                                                                         |
|                              | 73006  | ACUTE OSTEOMYELITIS INVOLVING LOWER LEG                                                                    |
|                              | 73008  | ACUTE OSTEOMYELITIS INVOLVING OTHER SPECIFIED SITES                                                        |
|                              | 73005  | ACUTE OSTEOMYELITIS INVOLVING PELVIC REGION AND THIGH                                                      |
|                              | 73001  | ACUTE OSTEOMYELITIS INVOLVING SHOULDER REGION                                                              |
|                              | 73000  | ACUTE OSTEOMYELITIS, SITE UNSPECIFIED                                                                      |
|                              | 71156  | ARTHROPATHY LOWER LEG (INCL.KNEE) WITH OTHER VIRAL DISEASES                                                |
|                              | 71146  | ARTHROPATHY LOWER LEG(INCL.KNEE)WITH OTHER BACTERIAL DISEASES                                              |
|                              | 71148  | ARTHROPATHY OTHER SPECIF.SITES,WITH OTHER BACTERIAL DISEASES                                               |
|                              | 71145  | ARTHROPATHY PELVIC REGION/THIGH,WITH OTHER BACTERIAL DISEASES                                              |

|                  |       |                                                                |
|------------------|-------|----------------------------------------------------------------|
|                  | 71141 | ARTHROPATHY SHOULDER REGION,WITH OTHER BACTERIAL DISEASES      |
|                  | 7301  | CHRONIC OSTEOMYELITIS                                          |
|                  | 73017 | CHRONIC OSTEOMYELITIS INVOLVING ANKLE AND FOOT                 |
|                  | 73013 | CHRONIC OSTEOMYELITIS INVOLVING FOREARM                        |
|                  | 73014 | CHRONIC OSTEOMYELITIS INVOLVING HAND                           |
|                  | 73016 | CHRONIC OSTEOMYELITIS INVOLVING LOWER LEG                      |
|                  | 73019 | CHRONIC OSTEOMYELITIS INVOLVING MULTIPLE SITES                 |
|                  | 73018 | CHRONIC OSTEOMYELITIS INVOLVING OTHER SPECIFIED SITES          |
|                  | 73015 | CHRONIC OSTEOMYELITIS INVOLVING PELVIC REGION AND THIGH        |
|                  | 73011 | CHRONIC OSTEOMYELITIS INVOLVING SHOULDER REGION                |
|                  | 73012 | CHRONIC OSTEOMYELITIS INVOLVING UPPER ARM                      |
|                  | 73010 | CHRONIC OSTEOMYELITIS, SITE UNSPECIFIED                        |
|                  | 73089 | INFECT.INVOLV.BONE OF MULT.SITES,IN DISEASES CLASSIF.ELSEWHERE |
|                  | 03682 | MENINGOCOCCAL ARTHROPATHY                                      |
|                  | 7110  | PYOGENIC ARTHRITIS                                             |
|                  | 71107 | PYOGENIC ARTHRITIS INVOLVING ANKLE AND FOOT                    |
|                  | 71103 | PYOGENIC ARTHRITIS INVOLVING FOREARM                           |
|                  | 71104 | PYOGENIC ARTHRITIS INVOLVING HAND                              |
|                  | 71106 | PYOGENIC ARTHRITIS INVOLVING LOWER LEG (INCL.KNEE)             |
|                  | 71109 | PYOGENIC ARTHRITIS INVOLVING MULTIPLE SITES                    |
|                  | 71105 | PYOGENIC ARTHRITIS INVOLVING PELVIC REGION AND THIGH           |
|                  | 71101 | PYOGENIC ARTHRITIS INVOLVING SHOULDER REGION                   |
|                  | 71100 | PYOGENIC ARTHRITIS, SITE UNSPECIFIED                           |
|                  | 71191 | UNSPECIFIED INFECTIVE ARTHRITIS INVOLVING SHOULDER REGION      |
|                  | 7302  | UNSPECIFIED OSTEOMYELITIS                                      |
|                  | 73027 | UNSPECIFIED OSTEOMYELITIS INVOLVING ANKLE AND FOOT             |
|                  | 73023 | UNSPECIFIED OSTEOMYELITIS INVOLVING FOREARM                    |
|                  | 73024 | UNSPECIFIED OSTEOMYELITIS INVOLVING HAND                       |
|                  | 73026 | UNSPECIFIED OSTEOMYELITIS INVOLVING LOWER LEG                  |
|                  | 73029 | UNSPECIFIED OSTEOMYELITIS INVOLVING MULTIPLE SITES             |
|                  | 73028 | UNSPECIFIED OSTEOMYELITIS INVOLVING OTHER SPECIFIED SITES      |
|                  | 73025 | UNSPECIFIED OSTEOMYELITIS INVOLVING PELVIC REGION AND THIGH    |
|                  | 73021 | UNSPECIFIED OSTEOMYELITIS INVOLVING SHOULDER REGION            |
|                  | 73022 | UNSPECIFIED OSTEOMYELITIS INVOLVING UPPER ARM                  |
|                  | 73020 | UNSPECIFIED OSTEOMYELITIS, SITE UNSPECIFIED                    |
| Other infections | 03283 | DIPHTheritic PERITONITIS                                       |
|                  | 0312  | DISSEMINATED DISEASE DUE TO OTHER MYCOBACTERIA                 |
|                  | 0418  | OTHER SPEC.BACTERIAL INF;IN CONDIT.CLASS.ELSEWHERE,UNSP.SITE   |
|                  | 04189 | OTHER SPECIFIED BACTERIA INFECTION                             |
|                  | 01485 | OTHER TB. INTESTINES, CONFIRMED HISTOLOGICALLY                 |
|                  | 01090 | PRIM. TB. INFEC., UNSP.TYPE, UNSP.EXAMINATION                  |
|                  | 0940  | TABES DORSALIS                                                 |
|                  | 01304 | TB. MENINGITIS, FOUND BY BACTERIAL CULTURE                     |
|                  | 01120 | TB. OF LUNG + CAVITATION, UNSP. EXAMINATION                    |
|                  | 01404 | TB. PERITONITIS, FOUND BY BACTERIAL CULTURE                    |

|                               |       |                                                              |
|-------------------------------|-------|--------------------------------------------------------------|
|                               | 01311 | TUBERCULOMA OF MENINGES, BACT/HISTOL. EXAM. NOT DONE         |
|                               | 0419  | UNSP. BACTERIAL INFECTION, UNSP. SITE                        |
|                               | 01194 | UNSP. PULMONARY TB., FOUND BY BACTERIAL CULTURE              |
|                               | 01190 | UNSP. PULMONARY TB., UNSP. EXAMINATION                       |
|                               | 01394 | UNSP. TB. OF C.N.S. FOUND BY BACTERIAL CULTURE               |
|                               | 0419  | UNSPEC.BACTERIAL INF;IN CONDIT. CLASSIF.ELSEWHERE,UNSP.SITE  |
|                               | 0319  | UNSPECIFIED DISEASES DUE TO MYCOBACTERIA                     |
|                               | 0119  | UNSPECIFIED PULMONARY TUBERCULOSIS                           |
| <b>Respiratory infections</b> | 0796  | RESPIRATORY SYNCYTIAL VIRUS (RSV)                            |
|                               | 0793  | RHINOVIRUS INFECTION, UNSP. SITE                             |
|                               | 485   | BRONCHOPNEUMONIA, ORGANISM UNSPECIFIED                       |
|                               | 5100  | EMPYEMA WITH FISTULA                                         |
|                               | 5109  | EMPYEMA WITHOUT MENTION OF FISTULA                           |
|                               | 486   | PNEUMONIA, ORGANISM UNSPECIFIED                              |
|                               | 5130  | ABSCESS OF LUNG                                              |
|                               | 46619 | AC. BRONCHIOLITIS DUE TO OTHER INFECTIOUS ORGANISMS          |
|                               | 46611 | AC. BRONCHIOLITIS DUE TO RESPIRATORY SYNCYTIAL VIRUS (RSV)   |
|                               | 4661  | ACUTE BRONCHIOLITIS                                          |
|                               | 4660  | ACUTE BRONCHITIS                                             |
|                               | 466   | ACUTE BRONCHITIS AND BRONCHIOLITIS                           |
|                               | 46430 | ACUTE EPIGLOTTITIS WITHOUT MENTION OF OBSTRUCTION            |
|                               | 4612  | ACUTE ETHMOIDAL SINUSITIS                                    |
|                               | 4611  | ACUTE FRONTAL SINUSITIS                                      |
|                               | 4640  | ACUTE LARYNGITIS                                             |
|                               | 464   | ACUTE LARYNGITIS AND TRACHEITIS                              |
|                               | 46400 | ACUTE LARYNGITIS WITHOUT MENTION OF OBSTRUCTION              |
|                               | 4650  | ACUTE LARYNGOPHARYNGITIS                                     |
|                               | 46420 | ACUTE LARYNGOTRACHEITIS WITHOUT MENTION OF OBSTRUCTION       |
|                               | 4610  | ACUTE MAXILLARY SINUSITIS                                    |
|                               | 460   | ACUTE NASOPHARYNGITIS (COMMON COLD)                          |
|                               | 462   | ACUTE PHARYNGITIS                                            |
|                               | 4619  | ACUTE SINUSITIS, UNSPECIFIED                                 |
|                               | 4613  | ACUTE SPHENOIDAL SINUSITIS                                   |
|                               | 463   | ACUTE TONSILLITIS                                            |
|                               | 46410 | ACUTE TRACHEITIS WITHOUT MENTION OF OBSTRUCTION              |
|                               | 465   | ACUTE UPPER RESPIRATORY INFECTIONS OF MULTIPLE OR UNSP.SITES |
|                               | 4658  | ACUTE UPPER RESPIRATORY INFECTIONS OF OTHER MULTIPLE SITES   |
|                               | 4659  | ACUTE UPPER RESPIRATORY INFECTIONS OF UNSPECIFIED SITE       |
|                               | 4829  | BACTERIAL PNEUMONIA, UNSPECIFIED                             |
|                               | 490   | BRONCHITIS, NOT SPECIFIED AS ACUTE OR CHRONIC                |
|                               | 4732  | CHRONIC ETHMOIDAL SINUSITIS                                  |
|                               | 4731  | CHRONIC FRONTAL SINUSITIS                                    |
|                               | 4730  | CHRONIC MAXILLARY SINUSITIS                                  |
|                               | 4720  | CHRONIC RHINITIS                                             |
|                               | 4733  | CHRONIC SPHENOIDAL SINUSITIS                                 |



|                 |        |                                                             |
|-----------------|--------|-------------------------------------------------------------|
|                 | 4644   | CROUP                                                       |
|                 | 4880   | INFLUENZA DUE TO IDENTIFIED AVIAN INFLUENZA VIRUS           |
|                 | 4881   | INFLUENZA DUE TO IDENTIFIED NOVEL H1N1 INFLUENZA VIRUS      |
|                 | 4878   | INFLUENZA WITH OTHER MANIFESTATIONS                         |
|                 | 4871   | INFLUENZA WITH OTHER RESPIRATORY MANIFESTATIONS             |
|                 | 4870   | INFLUENZA WITH PNEUMONIA                                    |
|                 | 49121  | OBSTRUCTIVE CHR. BRONCHITIS WITH(ACUTE)EXACERBATION         |
|                 | 4618   | OTHER ACUTE SINUSITIS                                       |
|                 | 4738   | OTHER CHRONIC SINUSITIS                                     |
|                 | 47822  | PARAPHARYNGEAL ABSCESS                                      |
|                 | 475    | PERITONSILLAR ABSCESS                                       |
|                 | 481    | PNEUMOCOCCAL PNEUMONIA                                      |
|                 | 481    | PNEUMOCOCCAL PNEUMONIA (STREPTOCOCCUS PNEUMONIAE PNEUMONIA) |
|                 | 4831   | PNEUMONIA DUE TO CHLAMYDIA                                  |
|                 | 4800   | PNEUMONIA DUE TO ADENOVIRUS                                 |
|                 | 4822   | PNEUMONIA DUE TO HEMOPHILUS INFLUENZAE (H. INFLUENZAE)      |
|                 | 4820   | PNEUMONIA DUE TO KLEBSIELLA PNEUMONIAE                      |
|                 | 4830   | PNEUMONIA DUE TO MYCOPLASMA PNEUMONIAE                      |
|                 | 483    | PNEUMONIA DUE TO OTHER SPECIFIED ORGANISM                   |
|                 | 4838   | PNEUMONIA DUE TO OTHER SPECIFIED ORGANISM                   |
|                 | 4808   | PNEUMONIA DUE TO OTHER VIRUS NOT ELSEWHERE CLASSIFIED       |
|                 | 4802   | PNEUMONIA DUE TO PARAINFLUENZA VIRUS                        |
|                 | 4821   | PNEUMONIA DUE TO PSEUDOMONAS                                |
|                 | 4801   | PNEUMONIA DUE TO RESPIRATORY SYNCYTIAL VIRUS                |
|                 | 48241  | PNEUMONIA DUE TO STAPHYLOCOCCUS AUREUS                      |
|                 | 4823   | PNEUMONIA DUE TO STREPTOCOCCUS                              |
|                 | 48231  | PNEUMONIA DUE TO STREPTOCOCCUS, GROUP A                     |
|                 | 48230  | PNEUMONIA DUE TO STREPTOCOCCUS, UNSPECIFIED                 |
|                 | 4841   | PNEUMONIA IN CYTOMEGALIC INCLUSION DISEASE                  |
|                 | 47824  | RETROPHARYNGEAL ABSCESS                                     |
|                 | 0341   | SCARLET FEVER                                               |
|                 | 0340   | STREPTOCOCCAL SORE THROAT                                   |
|                 | 034    | STREPTOCOCCAL SORE THROAT AND SCARLET FEVER                 |
|                 | 46450  | SUPRAGLOTTITIS WITHOUT MENTION OF OBSTRUCTION               |
|                 | 4739   | UNSPECIFIED SINUSITIS (CHRONIC)                             |
|                 | 480    | VIRAL PNEUMONIA                                             |
|                 | 4809   | VIRAL PNEUMONIA, UNSPECIFIED                                |
|                 | 0331   | WHOOPING COUGH DUE TO BORDETELLA PARAPERTUSSIS              |
|                 | 0330   | WHOOPING COUGH DUE TO BORDETELLA PERTUSSIS (B. PERTUSSIS)   |
|                 | 0339   | WHOOPING COUGH, UNSPECIFIED ORGANISM                        |
| Skin infections | 1123   | CANDIDIASIS OF SKIN AND NAILS                               |
|                 | 0400   | GAS GANGRENE                                                |
|                 | 6828 1 | ABSCESS OF SCALP                                            |
|                 | 1120   | CANDIDIASIS OF MOUTH                                        |

|                            |       |                                                          |
|----------------------------|-------|----------------------------------------------------------|
|                            | 6805  | CARBUNCLE AND FURUNCLE OF BUTTOCK                        |
|                            | 6800  | CARBUNCLE AND FURUNCLE OF FACE                           |
|                            | 6806  | CARBUNCLE AND FURUNCLE OF LEG, EXCEPT FOOT               |
|                            | 6801  | CARBUNCLE AND FURUNCLE OF NECK                           |
|                            | 6809  | CARBUNCLE AND FURUNCLE OF UNSPECIFIED SITE               |
|                            | 6825  | CELLULITIS AND ABSCESS OF BUTTOCK                        |
|                            | 6820  | CELLULITIS AND ABSCESS OF FACE                           |
|                            | 6827  | CELLULITIS AND ABSCESS OF FOOT, EXCEPT TOES              |
|                            | 6824  | CELLULITIS AND ABSCESS OF HAND, EXCEPT FINGERS AND THUMB |
|                            | 6826  | CELLULITIS AND ABSCESS OF LEG, EXCEPT FOOT               |
|                            | 6821  | CELLULITIS AND ABSCESS OF NECK                           |
|                            | 6828  | CELLULITIS AND ABSCESS OF OTHER SPECIFIED SITES          |
|                            | 6822  | CELLULITIS AND ABSCESS OF TRUNK                          |
|                            | 6819  | CELLULITIS AND ABSCESS OF UNSPECIFIED DIGIT              |
|                            | 6829  | CELLULITIS AND ABSCESS OF UNSPECIFIED SITES              |
|                            | 6823  | CELLULITIS AND ABSCESS OF UPPER ARM AND FOREARM          |
|                            | 07811 | CONDYLOMA ACUMINATUM                                     |
|                            | 1119  | DERMATOMYCOSIS, UNSPECIFIED                              |
|                            | 1104  | DERMATOPHYTOSIS OF FOOT                                  |
|                            | 1103  | DERMATOPHYTOSIS OF GROIN AND PERIANAL AREA               |
|                            | 1101  | DERMATOPHYTOSIS OF NAIL                                  |
|                            | 1100  | DERMATOPHYTOSIS OF SCALP AND BEARD                       |
|                            | 1105  | DERMATOPHYTOSIS OF THE BODY                              |
|                            | 1109  | DERMATOPHYTOSIS OF UNSPECIFIED SITE                      |
|                            | 035   | ERYSIPELAS                                               |
|                            | 684   | IMPETIGO                                                 |
|                            | 0859  | LEISHMANIASIS, UNSPECIFIED                               |
|                            | 0780  | MOLLUSCUM CONTAGIOSUM                                    |
|                            | 72886 | NECROTIZING FASCIITIS                                    |
|                            | 68609 | OTHER PYODERMA                                           |
|                            | 1118  | OTHER SPECIFIED DERMATOMYCOSES                           |
|                            | 07819 | OTHER SPECIFIED VIRAL WARTS                              |
|                            | 6850  | PILONIDAL CYST WITH ABSCESS                              |
|                            | 6851  | PILONIDAL CYST WITHOUT MENTION OF ABSCESS                |
|                            | 1110  | PITYRIASIS VERSICOLOR                                    |
|                            | 07812 | PLANTAR WART                                             |
|                            | 68600 | PYODERMA, UNSP.                                          |
|                            | 68100 | UNSPECIFIED CELLULITIS AND ABSCESS OF FINGER             |
|                            | 0781  | VIRAL WARTS                                              |
|                            | 07810 | VIRAL WARTS, UNSPECIFIED                                 |
| Systemic febrile syndromes | 0783  | CAT-SCRATCH DISEASE                                      |
|                            | 04082 | TOXIC SHOCK SYNDROME                                     |
|                            | 022   | ANTHRAX                                                  |
|                            | 08882 | BABESIOSIS                                               |
|                            | 0239  | BRUCELLOSIS, UNSPECIFIED                                 |

|                              |       |                                                                     |
|------------------------------|-------|---------------------------------------------------------------------|
|                              | 1000  | LEPTOSPIROSIS ICTEROHEMORRHAGICA                                    |
|                              | 08881 | LYME DISEASE (ERYTHEMA CHRONICUM MIGRANS)                           |
|                              | 0846  | MALARIA, UNSPECIFIED                                                |
|                              | 0810  | MURINE (ENDEMIC) TYPHUS                                             |
|                              | 0838  | OTHER SPECIFIED RICKETTSIOSES                                       |
|                              | 0209  | PLAGUE, UNSPECIFIED                                                 |
|                              | 0205  | PNEUMONIC PLAGUE, UNSPECIFIED                                       |
|                              | 0830  | Q FEVER                                                             |
|                              | 0879  | RELAPSING FEVER, UNSPECIFIED                                        |
|                              | 0839  | RICKETTSIOSIS, UNSPECIFIED                                          |
|                              | 0820  | SPOTTED FEVERS                                                      |
|                              | 0269  | UNSPECIFIED RAT-BITE FEVER                                          |
| <b>Urological infections</b> | 59010 | AC.PYELONEPHRITIS WITHOUT LESION OF RENAL MEDULLARY NECROSIS        |
|                              | 5950  | ACUTE CYSTITIS                                                      |
|                              | 5901  | ACUTE PYELONEPHRITIS                                                |
|                              | 0990  | CHANCROID                                                           |
|                              | 59581 | CYSTITIS CYSTICA                                                    |
|                              | 5959  | CYSTITIS, UNSPECIFIED                                               |
|                              | 05410 | GENITAL HERPES, UNSPECIFIED                                         |
|                              | 09840 | GONOCOCCAL CONJUNCTIVITIS (NEONATORUM)                              |
|                              | 0980  | GONOCOCCAL INFECTION, ACUTE, OF LOWER GENITOURINARY TRACT           |
|                              | 09882 | GONOCOCCAL MENINGITIS                                               |
|                              | 09886 | GONOCOCCAL PERITONITIS                                              |
|                              | 60491 | ORCHITIS AND EPIDIDYMITIS IN DISEASES CLASSIFIED ELSEWHERE          |
|                              | 60490 | ORCHITIS AND EPIDIDYMITIS, UNSPECIFIED                              |
|                              | 6040  | ORCHITIS, EPIDIDYMITIS, AND EPIDIDYMO-ORCHITIS, WITH ABSCESS        |
|                              | 60499 | OTHER ORCHITIS, EPIDIDYMITIS, EPIDIDYMO-ORCHITIS, WITHOUT ABSCESS   |
|                              | 07988 | OTHER SPEC. CHLAMYDIAL INFECTION                                    |
|                              | 59589 | OTHER SPECIFIED TYPES OF CYSTITIS                                   |
|                              | 59789 | OTHER URETHRITIS                                                    |
|                              | 6019  | PROSTATITIS, UNSPECIFIED                                            |
|                              | 59080 | PYELONEPHRITIS, UNSPECIFIED                                         |
|                              | 5902  | RENAL AND PERINEPHRIC ABSCESS                                       |
|                              | 07998 | UNSP. CHLAMYDIAL INFECTION                                          |
|                              | 5970  | URETHRAL ABSCESS                                                    |
|                              | 59780 | URETHRITIS, UNSPECIFIED                                             |
|                              | 5990  | URINARY TRACT INFECTION, SITE NOT SPECIFIED                         |
| <b>Viral infections</b>      | 0790  | ADENOVIRUS INFECTION IN CONDITIONS CLASSIFIED ELSEWHERE, UNSP. SITE |
|                              | 0790  | ADENOVIRUS INFECTION, UNSP. SITE                                    |
|                              | 0527  | CHICKENPOX WITH OTHER SPECIFIED COMPLICATIONS                       |
|                              | 0528  | CHICKENPOX WITH UNSPECIFIED COMPLICATION                            |
|                              | 0792  | COXSACKIE VIRUS INFECTION, UNSP. SITE                               |
|                              | 0785  | CYTOMEGALIC INCLUSION DISEASE                                       |
|                              | 0785  | CYTOMEGALOVIRAL DISEASE                                             |
|                              | 0791  | ECHO VIRUS INFECTION, UNSP. SITE                                    |

|       |                                                              |
|-------|--------------------------------------------------------------|
| 0540  | ECZEMA HERPETICUM                                            |
| 0774  | EPIDEMIC HEMORRHAGIC CONJUNCTIVITIS                          |
| 0570  | ERYTHEMA INFECTIONOSUM (FIFTH DISEASE)                       |
| 0784  | FOOT AND MOUTH DISEASE                                       |
| 05311 | GENICULATE HERPES ZOSTER                                     |
| 0743  | HAND, FOOT, AND MOUTH DISEASE                                |
| 05479 | HERPES SIMPLEX + OTHER SPEC. COMPLICATIONS                   |
| 05440 | HERPES SIMPLEX + UNSP. OPHTHALMIC COMPLICATION               |
| 05441 | HERPES SIMPLEX DERMATITIS OF EYELID                          |
| 05443 | HERPES SIMPLEX DISCIFORM KERATITIS                           |
| 05449 | HERPES SIMPLEX WITH OTHER OPHTHALMIC COMPLICATIONS           |
| 0549  | HERPES SIMPLEX WITHOUT MENTION OF COMPLICATION               |
| 05319 | HERPES ZOSTER + OTHER NERVOUS SYSTEM COMPLICATIONS           |
| 05329 | HERPES ZOSTER + OTHER OPHTHALMIC COMPLICATIONS               |
| 05320 | HERPES ZOSTER DERMATITIS OF EYELID                           |
| 0539  | HERPES ZOSTER WITHOUT MENTION OF COMPLICATION                |
| 0542  | HERPETIC GINGIVOSTOMATITIS                                   |
| 0546  | HERPETIC WHITLOW                                             |
| 075   | INFECTIOUS MONONUCLEOSIS                                     |
| 0559  | MEASLES WITHOUT MENTION OF COMPLICATION                      |
| 0723  | MUMPS PANCREATITIS                                           |
| 0729  | MUMPS WITHOUT MENTION OF COMPLICATION                        |
| 0773  | OTHER ADENOVIRAL CONJUNCTIVITIS                              |
| 07989 | OTHER SPEC. VIRAL INFECTION                                  |
| 07889 | OTHER SPECIFIED DISEASES DUE TO VIRUSES                      |
| 07889 | OTHER SPECIFIED DISEASES DUE TO VIRUSES AND CHLAMYDIAE       |
| 0578  | OTHER SPECIFIED VIRAL EXANTHEMATA                            |
| 0798  | OTHER SPECIFIED VIRAL INFECTION CLASSIF.ELSEWHERE,UNSP.SITE  |
| 05810 | ROSEOLA INFANTUM, UNSPECIFIED                                |
| 0569  | RUBELLA WITHOUT MENTION OF COMPLICATION                      |
| 07799 | UNSP. DIS. OF CONJUNCTIVA DUE TO VIRUSES                     |
| 0799  | UNSP. VIRAL & CHLAMYDIAL INFECTION                           |
| 07999 | UNSP. VIRAL INFECTION                                        |
| 07999 | UNSP. VIRAL INFECTION (ADDITIONAL CODE)                      |
| 0799  | UNSP.VIRAL INFECT.IN CONDITIONS CLASSIF.ELSEWHERE,UNSP.SITE  |
| 0779  | UNSPEC.DISEASES OF CONJUNCTIVA DUE TO VIRUSES AND CHLAMYDIAE |
| 0521  | VARICELLA (HEMORRHAGIC) PNEUMONITIS                          |
| 0529  | VARICELLA WITHOUT MENTION OF COMPLICATION                    |
| 0579  | VIRAL EXANTHEM, UNSPECIFIED                                  |
| 0701  | VIRAL HEPATITIS A WITHOUT HEPATIC COMA                       |
| 0701  | VIRAL HEPATITIS A WITHOUT MENTION OF HEPATIC COMA            |
